# Supplementary material for: Gas chromatographic-ion mobility spectrometry combined with a multivariate analysis model exploring the characteristic changes of odor components during the processing of black sesame
Source: Royal Society of Chemistry journal article supplement (doi:10.1039/d0ay01257b), 2020-01-01
Supplement: d0ay01257b1.pdf [file d0ay01257b1.pdf]

## Apparatus and Methods

Table 1 and 2 show the detailed parameters and analytical conditions of each detection unit in the GC-IMS technique used in this study.

Table 1 GC-IMS parameter settings for each analysis unit

| Unit                      | Setting                | Parameter                   |
|---------------------------|------------------------|-----------------------------|
| GC                        | Column Type            | FS-SE-54-CB-1 15m ID:0.53mm |
|                           | Column Temperature     | 60 °C                       |
|                           | Carrier Gas            | N <sub>2</sub>              |
| IMS                       | Detector Model         | FlavourSpec®                |
|                           | IMS Temperature        | 45 °C                       |
|                           | IMS Drift Gas          | N <sub>2</sub>              |
| Automatic Sampling System | Injection Method       | Headspace Injection         |
|                           | Incubation Time        | 20 min                      |
|                           | Incubation Temperature | 80 °C                       |
|                           | Incubation Speed       | 500 rpm                     |
|                           | Needle Temperature     | 85 °C                       |
|                           | Injection Volume       | 500 µL                      |

Table 2 GC-IMS analysis condition

| Time      | E1 (IMS Drift Gas)       | E2 (GC Carrier Gas)      | Run   |
|-----------|--------------------------|--------------------------|-------|
| 00:00,000 | 150 mL·min <sup>-1</sup> | 2 mL·min <sup>-1</sup>   | Rec   |
| 02:00,000 | 150mL·min <sup>-1</sup>  | 2 mL·min <sup>-1</sup>   | 2min  |
| 10:00,000 | 150mL·min <sup>-1</sup>  | 20mL·min <sup>-1</sup>   | -     |
| 20:00,000 | 150mL·min <sup>-1</sup>  | 150 mL·min <sup>-1</sup> | 15min |
| 35:00,000 | 150mL·min <sup>-1</sup>  | 150 mL·min <sup>-1</sup> | Stop  |

## Methodological verification

In order to verify the feasibility of the GC-IMS analytical method used in this experiment, we used this analytical method to detect 12 ppb hexanone and collected the signal intensity, IMS drift time and GC retention time for 18 days continuously (average test once every 5 min, 5138 times in total). Fig. 1 shows the range of fluctuations (a) and the distribution of deviations (b) of the three for 18 consecutive days of testing. The signal intensity values fluctuate from 0.323 to 0.396 (mean value 0.351) with the RSD of 2.604%; the drift time fluctuates from 12.79 to 13.02 (mean value 12.94) with the RSD of 0.371%, and the retention time fluctuates from 16.65 to 17.10 (mean value 16.80) with the RSD of 0.595%. The RSD of all three was controlled within 3%, proving that the instrument is precise and reliable, the system is stable and the method is feasible.

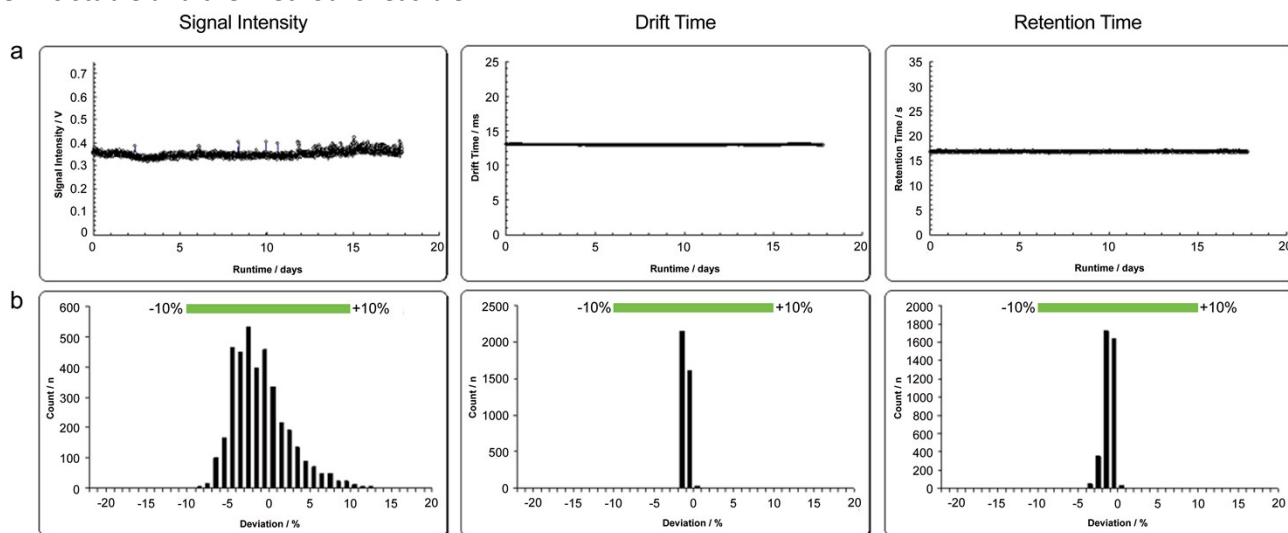

Figure 1 Validation of the feasibility of the GC-IMS analytical method

## GC-IMS qualitative and quantitative

Fig. 2 shows the raw qualitative spectrum of the response signals in all samples. Tables 3-6 show the original GC-IMS data for the ten batches of samples (S1-H9) in this study. Due to the large amount of information, they were split into

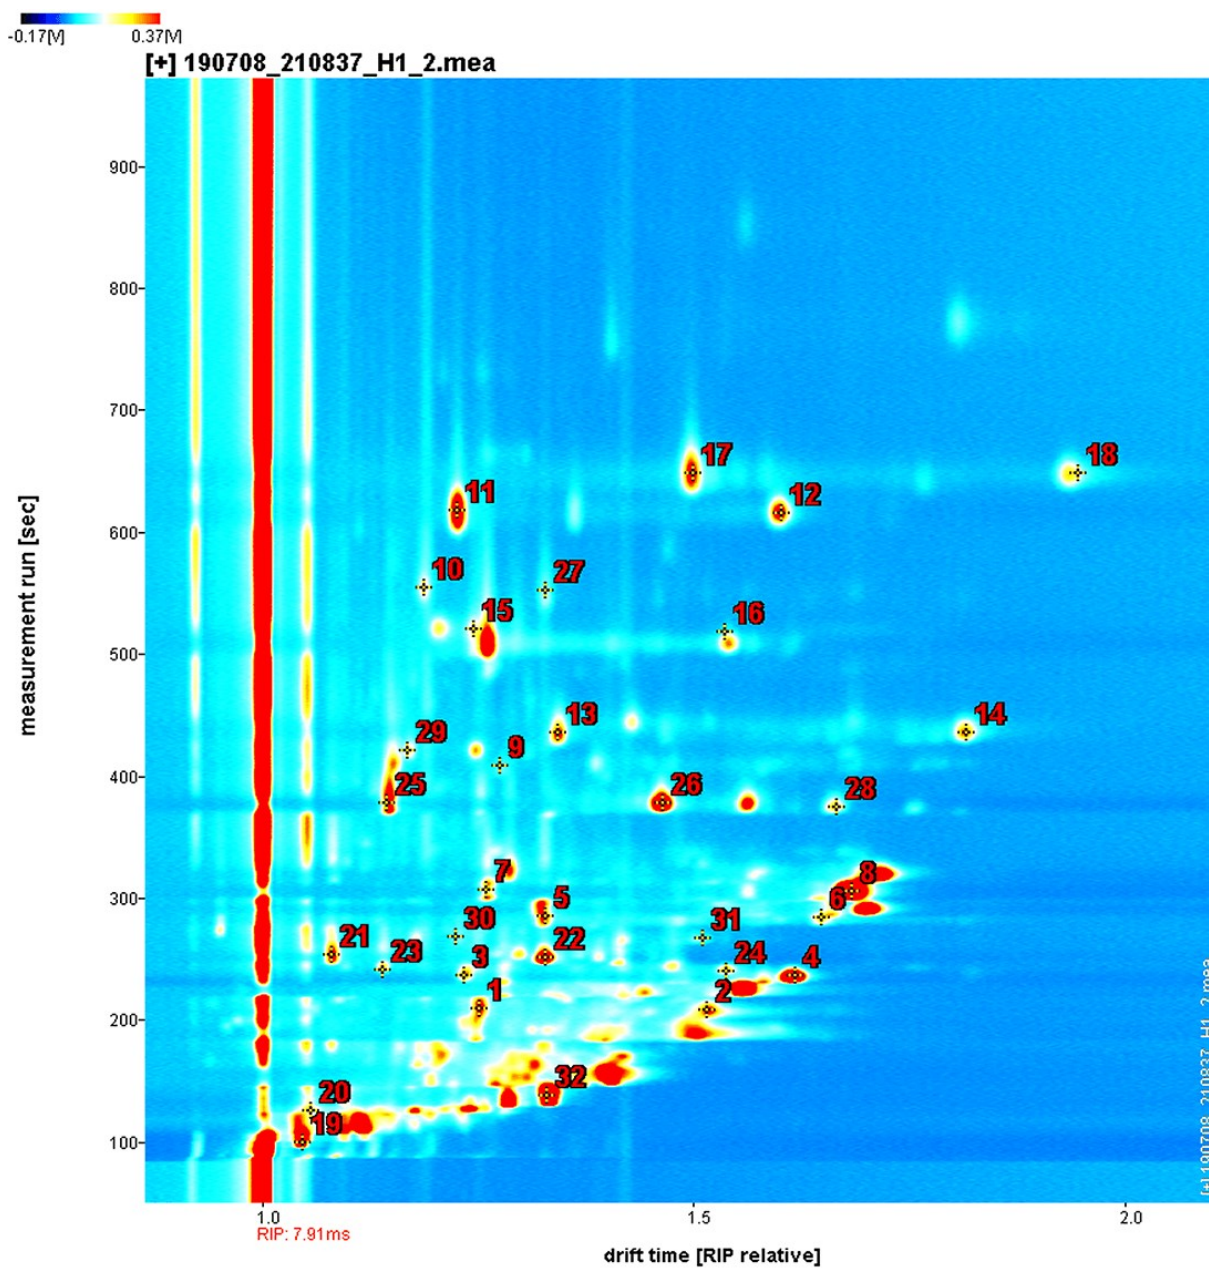

Figure 2 GC-IMS qualitative results for response signals  
four tables.

Table 3 GC-IMS data for samples S1-H2

| Compound                | RI     | Rt [sec]   | Dt [RIPrel] | S1-1     | S1-2     | S1-3       | H1-1     | H1-2     | H1-3       | H2-1     | H2-2     | H2-3       |
|-------------------------|--------|------------|-------------|----------|----------|------------|----------|----------|------------|----------|----------|------------|
| 1                       | 531.3  | 114.854996 | 1.119       | 1318.416 | 1319.216 | 1292.43968 | 2050.628 | 2041.258 | 2005.02414 | 1970.925 | 1834.307 | 1864.56368 |
| 2                       | 532.7  | 115.244995 | 1.094       | 2918.608 | 3159.896 | 2978.46696 | 1321.595 | 1254.015 | 1262.0489  | 1252.448 | 1182.769 | 1193.25633 |
| 3                       | 540.3  | 117.39     | 1.147       | 817.183  | 1028.391 | 904.33126  | 599.74   | 694.992  | 634.41868  | 558.107  | 467.851  | 502.71942  |
| 4                       | 670    | 161.06999  | 1.23        | 436.309  | 401.156  | 410.35785  | 86.964   | 77.387   | 80.53199   | 140.586  | 188.48   | 161.24234  |
| 5                       | 728.4  | 190.31999  | 1.247       | 259.508  | 291.96   | 270.21932  | 268.028  | 293.794  | 275.29278  | 116.942  | 90.963   | 101.87345  |
| 6                       | 696    | 172.37999  | 1.205       | 581.155  | 536.024  | 547.41771  | 872.138  | 905.06   | 870.82702  | 967.619  | 967.765  | 948.33816  |
| 7                       | 705.5  | 177.45     | 1.156       | 219.058  | 194.409  | 202.59883  | 245.608  | 284.5    | 259.75292  | 495.742  | 644.744  | 558.83814  |
| 8                       | 681.3  | 165.555    | 1.317       | 400.392  | 449.127  | 416.26431  | 547.23   | 579.16   | 551.9311   | 608.164  | 612.615  | 598.18171  |
| 1-pentanol monomer      | 763.2  | 211.575    | 1.252       | 583.163  | 628.846  | 593.88441  | 786.643  | 772.522  | 763.99085  | 453.206  | 389.442  | 412.89752  |
| 10                      | 789.5  | 228.93     | 1.278       | 421.657  | 424.052  | 414.39741  | 333.016  | 327.55   | 323.67734  | 396.037  | 368.701  | 374.72162  |
| 1-hexanol monomer       | 871.8  | 287.81998  | 1.324       | 1390.224 | 1426.271 | 1380.08255 | 1134.59  | 1077.976 | 1084.15734 | 748.931  | 611.885  | 666.79984  |
| 12                      | 910.5  | 323.895    | 1.285       | 693.621  | 714.74   | 690.09689  | 652.144  | 624.376  | 625.4948   | 423.218  | 397.547  | 402.17485  |
| 13                      | 827.8  | 254.67     | 1.298       | 21.481   | 23.565   | 22.07254   | 140.136  | 160.887  | 147.50127  | 162.219  | 150.124  | 153.04807  |
| 14                      | 650.2  | 153.465    | 1.407       | 876.763  | 887.386  | 864.43301  | 3130.513 | 2789.501 | 2900.80686 | 2550.488 | 2428.829 | 2439.86533 |
| 15                      | 691.9  | 170.235    | 1.417       | 90.957   | 105.808  | 96.41485   | 625.95   | 585.735  | 593.72565  | 279.77   | 203.782  | 236.94048  |
| Butyl acetate dimer     | 801.8  | 236.92499  | 1.615       | 1290.519 | 1328.783 | 1283.45798 | 1872.514 | 1826.165 | 1812.35271 | 991.65   | 916.94   | 935.2091   |
| 17                      | 951.5  | 371.47498  | 1.331       | 145.525  | 161.778  | 150.57847  | 91.046   | 86.646   | 87.06908   | 49.052   | 52.658   | 49.8379    |
| 1-hexanol dimer         | 869.1  | 285.675    | 1.654       | 827.242  | 961.83   | 876.64528  | 681.714  | 680.978  | 667.71908  | 173.467  | 135.429  | 151.35904  |
| 19                      | 874.7  | 290.16     | 1.703       | 1505.019 | 1523.959 | 1484.19922 | 1658.924 | 1620.21  | 1606.77566 | 525.683  | 470.668  | 488.21199  |
| Ethyl valerate dimer    | 893.5  | 305.955    | 1.681       | 4067.579 | 4133.078 | 4018.32193 | 4270.235 | 4233.779 | 4166.96686 | 2276.376 | 2193.482 | 2190.23042 |
| 21                      | 908.4  | 321.555    | 1.713       | 1703.275 | 1717.819 | 1676.33606 | 1983.138 | 2016.957 | 1960.04655 | 548.049  | 484.875  | 506.13276  |
| 22                      | 1004.3 | 444.99     | 1.686       | 93.06    | 94.808   | 92.05532   | 93.85    | 76.379   | 83.41221   | 98.44    | 71.744   | 83.39016   |
| 1-octen-3-one           | 979.3  | 407.745    | 1.275       | 50.454   | 51.942   | 50.17404   | 72.69    | 77.308   | 73.49902   | 48.868   | 55.58    | 51.17952   |
| 24                      | 968.5  | 393.31497  | 1.211       | 48.065   | 52.807   | 49.42728   | 29.455   | 32.402   | 30.30993   | 22.023   | 25.807   | 23.4367    |
| 25                      | 941.6  | 359.38498  | 1.207       | 45.023   | 42.153   | 42.71624   | 29.563   | 24.358   | 26.42129   | 27.057   | 25.966   | 25.98127   |
| 26                      | 1045.1 | 520.45496  | 1.205       | 571.686  | 592.066  | 570.23848  | 522.844  | 471.946  | 487.4471   | 371.536  | 316.369  | 337.07345  |
| 27                      | 1063.6 | 558.675    | 1.187       | 465.488  | 498.343  | 472.27719  | 429.578  | 420.195  | 416.38877  | 362.35   | 311.716  | 330.29234  |
| Methyl benzoate monomer | 1095.1 | 630.435    | 1.226       | 3182.23  | 3123.3   | 3089.7097  | 2575.524 | 2412.75  | 2444.25426 | 2043.742 | 1722.691 | 1845.55217 |
| Methyl benzoate dimer   | 1090.2 | 618.735    | 1.6         | 1754.633 | 1724.797 | 1704.9207  | 1459.13  | 1377.625 | 1390.00995 | 1039.233 | 876.373  | 938.64694  |

| Compound                 | RI     | Rt [sec]  | Dt [RIPrel] | S1-1    | S1-2     | S1-3       | H1-1     | H1-2     | H1-3       | H2-1     | H2-2     | H2-3       |
|--------------------------|--------|-----------|-------------|---------|----------|------------|----------|----------|------------|----------|----------|------------|
| Ethyl hexanoate monomer  | 1002.3 | 441.675   | 1.342       | 1067.61 | 1173.58  | 1098.1831  | 999.228  | 979.507  | 969.58015  | 266.702  | 264.218  | 260.1508   |
| 31                       | 982.4  | 412.03497 | 1.386       | 79.846  | 87.747   | 82.12057   | 168.281  | 153.198  | 157.52471  | 139.34   | 116.561  | 125.39149  |
| 32                       | 1027.5 | 486.525   | 1.261       | 65.514  | 67.84    | 65.34346   | 144.447  | 146.911  | 142.76542  | 71.021   | 48.281   | 58.45798   |
| 33                       | 915.4  | 329.15997 | 1.327       | 307.319 | 338.998  | 316.69533  | 224.822  | 237.615  | 226.59413  | 155.85   | 124.076  | 137.16374  |
| 34                       | 759.5  | 209.23499 | 1.298       | 166.911 | 189.59   | 174.68549  | 76.766   | 71.982   | 72.88652   | 109.516  | 126.116  | 115.45968  |
| Ethyl hexanoate dimer    | 999.9  | 437.58    | 1.818       | 497.512 | 590.389  | 533.07149  | 780.261  | 863.387  | 805.38752  | 121.253  | 103.867  | 110.3088   |
| 36                       | 690.8  | 169.65    | 1.18        | 971.511 | 1039.642 | 985.46497  | 588.73   | 546.523  | 556.27397  | 496.342  | 446.196  | 461.84362  |
| 37                       | 807.4  | 240.62999 | 1.82        | 69.01   | 61.524   | 63.96166   | 41.55    | 36.751   | 38.36749   | 34.026   | 35.787   | 34.20837   |
| 38                       | 1109.8 | 666.89996 | 1.26        | 91.975  | 118.1    | 102.93675  | 174.244  | 154.556  | 161.112    | 136.758  | 133.459  | 132.40633  |
| 39                       | 1299   | 1377.87   | 1.213       | 1091.78 | 1017.213 | 1033.40657 | 910.364  | 830.312  | 852.93124  | 791.915  | 714.201  | 737.99684  |
| 40                       | 861.4  | 279.63    | 0.951       | 92.419  | 75.062   | 82.06569   | 202.906  | 246.594  | 220.255    | 485.031  | 517.096  | 491.04223  |
| 41                       | 1047.2 | 524.55    | 1.266       | 482.471 | 338.909  | 402.4762   | 2549.013 | 2621.572 | 2533.58665 | 2169.213 | 1897.091 | 1992.48896 |
| phenylacetaldehyde dimer | 1040.5 | 511.28998 | 1.541       | 40.782  | 36.802   | 38.01616   | 482.81   | 561.032  | 511.48258  | 425.663  | 316.975  | 363.89262  |
| n-Nonanal monomer        | 1104.2 | 652.86    | 1.499       | 493.021 | 408.728  | 441.85701  | 1819.193 | 1769.389 | 1758.40518 | 1372.953 | 1182.982 | 1252.40815 |
| n-Nonanal dimer          | 1103   | 649.74    | 1.937       | 82.095  | 85.866   | 82.30089   | 792.156  | 809.107  | 784.61887  | 545.425  | 412.89   | 469.57435  |
| 45                       | 1004.5 | 445.37997 | 1.426       | 184.363 | 193.562  | 185.18325  | 366.331  | 332.933  | 342.63936  | 237.339  | 175.9    | 202.48711  |
| 46                       | 827    | 254.08499 | 1.389       | 21.95   | 22.448   | 21.75502   | 127.067  | 136.881  | 129.33452  | 52.655   | 48.614   | 49.62181   |
| 47                       | 902.9  | 315.705   | 1.349       | 31.568  | 34.029   | 32.14253   | 61.743   | 54.279   | 56.85078   | 81.635   | 67.123   | 72.89142   |
| 48                       | 820.6  | 249.59999 | 1.414       | 41.169  | 59.894   | 49.52087   | 202.218  | 211.804  | 202.87078  | 238.338  | 230.849  | 229.90163  |
| 49                       | 901.2  | 313.94998 | 1.446       | 18.61   | 20.704   | 19.26386   | 23.688   | 29.186   | 25.90826   | 60.217   | 53.721   | 55.82962   |
| 50                       | 888    | 301.08    | 1.361       | 27.574  | 29.62    | 28.02506   | 24.526   | 27.431   | 25.45893   | 31.127   | 25.817   | 27.90256   |
| ethanol                  | 484.9  | 102.57    | 1.047       | 2006.49 | 2247.546 | 2084.47764 | 1600.169 | 1375.934 | 1458.29047 | 1498.05  | 1462.105 | 1450.47595 |
| Furfurol monomer         | 829.7  | 256.035   | 1.08        | 115.841 | 116.828  | 114.00781  | 692.806  | 694.379  | 679.72065  | 717.221  | 692.489  | 690.7579   |
| 53                       | 908    | 321.16498 | 1.575       | 49.892  | 48.202   | 48.06606   | 127.717  | 133.456  | 127.97477  | 108.869  | 97.12    | 100.93461  |
| 54                       | 893.9  | 306.345   | 1.564       | 52.157  | 46.314   | 48.25079   | 131.847  | 142.493  | 134.4266   | 170.114  | 157.157  | 160.36279  |
| 55                       | 814.3  | 245.31    | 1.475       | 107.337 | 106.89   | 104.97123  | 234.991  | 244.685  | 235.04124  | 281.772  | 235.613  | 253.51865  |
| 56                       | 782.5  | 224.44499 | 1.446       | 88.232  | 78.041   | 81.47377   | 393.553  | 379.273  | 378.68474  | 438.32   | 389.68   | 405.72     |
| 57                       | 781.4  | 223.665   | 1.415       | 156.329 | 177.978  | 163.81043  | 428.743  | 322.31   | 368.01597  | 308.563  | 300.709  | 298.54328  |
| 58                       | 732.4  | 192.65999 | 1.312       | 57.581  | 54.727   | 55.03092   | 76.467   | 94.947   | 83.99286   | 76.667   | 68.747   | 71.25286   |
| 59                       | 756.4  | 207.28499 | 1.449       | 54.904  | 47.542   | 50.19854   | 88.686   | 90.088   | 87.59926   | 85.822   | 89.815   | 86.06213   |

| Compound                      | RI     | Rt [sec]  | Dt [RIPrel] | S1-1    | S1-2    | S1-3      | H1-1     | H1-2     | H1-3       | H2-1     | H2-2     | H2-3       |
|-------------------------------|--------|-----------|-------------|---------|---------|-----------|----------|----------|------------|----------|----------|------------|
| 60                            | 783.9  | 225.42    | 1.522       | 79.31   | 81.616  | 78.85374  | 233.367  | 264.155  | 243.78578  | 199.132  | 162.609  | 177.25309  |
| 1-pentanol dimer              | 759.5  | 209.23499 | 1.52        | 385.902 | 412.883 | 391.40465 | 961.665  | 937.669  | 930.67366  | 256.247  | 199.455  | 223.29398  |
| Acetic acid                   | 574.9  | 127.725   | 1.061       | 736.002 | 728.691 | 717.69957 | 495.517  | 620.973  | 547.0801   | 668.369  | 749.978  | 694.99003  |
| 63                            | 812.6  | 244.13998 | 1.282       | 46.064  | 46.762  | 45.48474  | 100.02   | 102.703  | 99.33427   | 115.905  | 110.008  | 110.69737  |
| 64                            | 788.5  | 228.34499 | 1.557       | 455.112 | 452.426 | 444.69362 | 2502.984 | 2483.686 | 2443.4683  | 2551.354 | 2300.35  | 2377.33496 |
| Z-3-hexen-1-ol dimer          | 845    | 267.15    | 1.507       | 17.731  | 16.571  | 16.80798  | 98.535   | 111.375  | 102.8559   | 71.64    | 61.702   | 65.33758   |
| 66                            | 989.4  | 421.78497 | 1.247       | 210.507 | 216.283 | 209.1271  | 390.223  | 366.483  | 370.78594  | 267.742  | 221.288  | 239.6247   |
| Ethyl lactate dimer           | 811.7  | 243.555   | 1.539       | 56.728  | 47.041  | 50.84681  | 264.773  | 282.41   | 268.11967  | 210.319  | 165.594  | 184.19737  |
| Benzaldehyde dimer            | 961.2  | 383.75998 | 1.464       | 418.044 | 403.555 | 402.58351 | 1980.289 | 1957.305 | 1929.42106 | 2217.031 | 1923.821 | 2029.01748 |
| Furfurol dimer                | 829.7  | 256.035   | 1.329       | 60.312  | 64.544  | 61.17944  | 1211.821 | 1265.742 | 1214.00587 | 1437.116 | 1335.238 | 1358.45346 |
| 70                            | 1002.2 | 441.47998 | 1.467       | 98.675  | 100.556 | 97.62319  | 107.956  | 131.965  | 117.56129  | 111.102  | 178.048  | 141.6835   |
| Phenylacetaldehyde<br>monomer | 1045.9 | 522.01495 | 1.24        | 279.986 | 260.25  | 264.71564 | 636.586  | 712.593  | 661.09771  | 974.388  | 1336.386 | 1132.27926 |
| 72                            | 1092.3 | 623.61    | 1.363       | 187.874 | 234.09  | 206.76236 | 244.831  | 358.503  | 295.63366  | 650.663  | 990.355  | 804.09882  |
| 73                            | 1103.1 | 649.935   | 1.529       | 132.973 | 98.161  | 113.25566 | 308.493  | 339.008  | 317.27549  | 427.199  | 535.77   | 471.85481  |
| 74                            | 712.6  | 181.34999 | 1.081       | 134.823 | 141.335 | 135.31742 | 205.885  | 203.24   | 200.47125  | 130.68   | 102.392  | 114.20528  |
| 75                            | 827.5  | 254.47499 | 1.272       | 23.14   | 19.397  | 20.84313  | 76.515   | 80.423   | 76.89962   | 79.877   | 75.294   | 76.03379   |
| Ethyl lactate monomer         | 814.3  | 245.31    | 1.141       | 43.412  | 31.333  | 36.62505  | 196.366  | 192.642  | 190.61392  | 211.496  | 189.489  | 196.48265  |
| 77                            | 845    | 267.15    | 1.184       | 291.532 | 302.733 | 291.18985 | 307.89   | 330.116  | 312.62294  | 315.938  | 419.129  | 360.18283  |
| Butyl acetate monomer         | 805.9  | 239.655   | 1.239       | 819.702 | 784.524 | 786.07074 | 578.63   | 557.349  | 556.62971  | 451.851  | 509.179  | 470.9047   |
| Ethyl valerate monomer        | 896.5  | 309.07498 | 1.26        | 785.457 | 780.512 | 767.32481 | 576.273  | 546.853  | 550.33174  | 708.289  | 644.062  | 662.65199  |
| Benzaldehyde monomer          | 960.1  | 382.395   | 1.148       | 770.07  | 749.962 | 744.81568 | 1320.408 | 1251.23  | 1260.10262 | 1228.027 | 1090.994 | 1136.32029 |
| 81                            | 982.1  | 411.645   | 1.45        | 32.706  | 27.771  | 29.63373  | 67.072   | 60.312   | 62.41816   | 98.291   | 159.704  | 126.41755  |
| 82                            | 982.4  | 412.03497 | 1.476       | 29.741  | 29.233  | 28.89726  | 41.293   | 52.376   | 45.89781   | 69.267   | 71.538   | 68.99445   |
| 83                            | 733.1  | 193.04999 | 1.335       | 45.988  | 57.245  | 50.58417  | 106.129  | 101.729  | 101.85042  | 89.555   | 90.097   | 88.02948   |
| 84                            | 753.6  | 205.53    | 1.345       | 48.846  | 54.143  | 50.46461  | 45.55    | 49.451   | 46.55049   | 72.255   | 75.214   | 72.25981   |
| 85                            | 876.9  | 291.91498 | 1.395       | 58.317  | 71.671  | 63.69412  | 40.291   | 41.258   | 39.95901   | 57.692   | 112.216  | 83.25492   |
| 86                            | 958.6  | 380.44498 | 1.383       | 64.341  | 61.169  | 61.4999   | 76.699   | 92.895   | 83.10106   | 132.72   | 184.915  | 155.64115  |
| 87                            | 961.7  | 384.34497 | 1.289       | 116.025 | 101.342 | 106.50983 | 154.603  | 157.398  | 152.88049  | 284.129  | 502.121  | 385.2625   |
| 88                            | 1144.4 | 761.67    | 1.406       | 101.479 | 141.401 | 119.0112  | 169.112  | 177.676  | 169.92612  | 183.954  | 157.972  | 167.54374  |

| Compound                | RI     | Rt [sec]  | Dt [RIPrel] | S1-1     | S1-2     | S1-3      | H1-1     | H1-2     | H1-3       | H2-1     | H2-2     | H2-3       |
|-------------------------|--------|-----------|-------------|----------|----------|-----------|----------|----------|------------|----------|----------|------------|
| 89                      | 1144.5 | 762.06    | 1.539       | 56.887   | 55.094   | 54.87069  | 54.714   | 84.686   | 68.306     | 88.584   | 104.048  | 94.38968   |
| 90                      | 1104.1 | 652.47    | 1.586       | 58.089   | 68.319   | 61.93992  | 112.885  | 137.455  | 122.6666   | 170.01   | 175.751  | 169.42289  |
| E -2-octenal            | 1062.2 | 555.75    | 1.326       | 150.064  | 175.548  | 159.54988 | 318.986  | 332.21   | 319.08604  | 263.619  | 260.056  | 256.60075  |
| 92                      | 1059.8 | 550.68    | 1.46        | 39.098   | 42.632   | 40.0477   | 71.992   | 75.421   | 72.23237   | 94.481   | 124.047  | 107.07872  |
| 93                      | 1031.8 | 494.52    | 1.369       | 37.036   | 44.668   | 40.03496  | 57.724   | 74.539   | 64.80887   | 74.085   | 92.902   | 81.82363   |
| E 2-heptenal            | 959.5  | 381.615   | 1.665       | 126.553  | 132.342  | 126.85855 | 367.077  | 402.685  | 377.18338  | 173.175  | 162.632  | 164.54543  |
| 95                      | 961    | 383.56497 | 1.563       | 183.034  | 177.924  | 176.86942 | 850.778  | 920.61   | 867.98012  | 753.915  | 655.557  | 690.64128  |
| 96                      | 739.7  | 196.95    | 0.956       | 217.862  | 226.157  | 217.56931 | 113.11   | 94.002   | 101.48488  | 235.197  | 188.008  | 207.37045  |
| 97                      | 800    | 235.75499 | 1.586       | 55.025   | 64.014   | 58.32911  | 236.875  | 232.295  | 229.8933   | 216.873  | 200.394  | 204.46083  |
| 98                      | 569.2  | 125.96999 | 1.174       | 290.936  | 350.658  | 314.38106 | 367.53   | 385.852  | 369.15718  | 359.692  | 324.296  | 335.15412  |
| 99                      | 571.7  | 126.74999 | 1.214       | 101.523  | 89.146   | 93.42781  | 193.587  | 171.443  | 178.8647   | 178.685  | 165.674  | 168.73591  |
| 100                     | 554.3  | 121.48499 | 1.196       | 102.855  | 123.185  | 110.7596  | 221.929  | 250.883  | 231.67788  | 180.49   | 184.087  | 178.64273  |
| 101                     | 717.2  | 183.885   | 1.394       | 106.579  | 114.82   | 108.48551 | 343.233  | 323.503  | 326.70064  | 94.009   | 85.111   | 87.7688    |
| 6-methyl-5-hepten-2-one | 992    | 425.49    | 1.17        | 142.953  | 118.239  | 127.98408 | 208.201  | 225.58   | 212.55269  | 200.981  | 189.286  | 191.23083  |
| 103                     | 984.7  | 415.155   | 1.15        | 131.784  | 164.652  | 145.25364 | 594.95   | 602.068  | 586.53882  | 403.78   | 328.743  | 358.93627  |
| 104                     | 787.3  | 227.56499 | 1.376       | 214.192  | 199.363  | 202.64195 | 226.31   | 266.112  | 241.28678  | 295.773  | 345.386  | 314.16791  |
| 105                     | 729.8  | 191.09999 | 1.51        | 431.687  | 504.135  | 458.55278 | 2319.928 | 2297.283 | 2262.43339 | 237.25   | 199.509  | 214.01191  |
| 106                     | 913    | 326.625   | 1.412       | 73.232   | 87.83    | 78.92038  | 94.135   | 53.648   | 72.41367   | 118.408  | 167.107  | 139.90235  |
| 107                     | 898.4  | 311.025   | 1.387       | 40.075   | 58.657   | 48.37868  | 50.974   | 64.538   | 56.60088   | 103.03   | 181.384  | 139.36286  |
| 108                     | 891.3  | 303.81    | 1.645       | 227.699  | 243.102  | 230.69249 | 262.949  | 246.607  | 249.68244  | 184.227  | 168.237  | 172.70736  |
| Z-3-hexen-1-ol monomer  | 845.8  | 267.735   | 1.227       | 81.219   | 74.726   | 76.41305  | 97.529   | 104.362  | 98.92659   | 136.428  | 135.746  | 133.36526  |
| 110                     | 868.1  | 284.895   | 1.228       | 50.869   | 44.992   | 46.97189  | 69.828   | 92.537   | 79.55885   | 99.623   | 115.416  | 105.36911  |
| 111                     | 845.5  | 267.53998 | 1.418       | 43.72    | 58.257   | 49.96873  | 212.857  | 215.556  | 209.92237  | 221.831  | 189.213  | 201.41156  |
| 112                     | 965.9  | 389.805   | 1.237       | 46.492   | 43.812   | 44.24896  | 70       | 64.331   | 65.82219   | 81.552   | 75.919   | 77.16079   |
| 113                     | 415.4  | 86.579994 | 1.085       | 34.892   | 59.627   | 46.31431  | 68.369   | 134.877  | 99.59054   | 182.412  | 227.994  | 201.09894  |
| 114                     | 636.4  | 148.39499 | 1.365       | 159.65   | 168.89   | 160.9846  | 622.213  | 539.357  | 569.1693   | 518.479  | 522.796  | 510.22475  |
| Ethyl Acetate           | 597.4  | 134.94    | 1.331       | 1982.617 | 1885.113 | 1895.1877 | 3435.273 | 3088.139 | 3196.47188 | 2669.282 | 2659.614 | 2611.15904 |
| 116                     | 582.9  | 130.26    | 1.286       | 658.406  | 628.5    | 630.58394 | 1494.148 | 1342.168 | 1389.79484 | 1735.63  | 1682.518 | 1674.89252 |
| 117                     | 569.8  | 126.16499 | 1.243       | 294.628  | 301.181  | 291.94641 | 1014.041 | 1016.299 | 994.8666   | 1306.322 | 1236.934 | 1246.19544 |

Table 4 GC-IMS data for samples H3-H5

| Compound                | RI     | Rt [sec]   | Dt [RIPrel] | H3-1     | H3-2     | H3-3       | H4-1     | H4-2     | H4-3       | H5-1     | H5-2     | H5-3       |
|-------------------------|--------|------------|-------------|----------|----------|------------|----------|----------|------------|----------|----------|------------|
| 1                       | 531.3  | 114.854996 | 1.119       | 1663.638 | 1711.973 | 1654.04939 | 1697.309 | 1712.242 | 1670.67999 | 1936.699 | 1844.455 | 1852.76546 |
| 2                       | 532.7  | 115.244995 | 1.094       | 1499.833 | 1560.269 | 1499.44998 | 1515.88  | 1397.149 | 1427.38421 | 1466.692 | 1433.014 | 1420.85594 |
| 3                       | 540.3  | 117.39     | 1.147       | 521.391  | 640.833  | 569.48976  | 541.419  | 580.682  | 549.82949  | 537.847  | 604.805  | 559.89948  |
| 4                       | 670    | 161.06999  | 1.23        | 232.628  | 209.044  | 216.41928  | 189.013  | 189.711  | 185.57476  | 245.269  | 224.254  | 230.06627  |
| 5                       | 728.4  | 190.31999  | 1.247       | 53.895   | 51.371   | 51.58034   | 27.901   | 37.826   | 32.20623   | 44.732   | 39.012   | 41.03456   |
| 6                       | 696    | 172.37999  | 1.205       | 1116.449 | 1102.149 | 1087.11302 | 1597.064 | 1570.901 | 1552.30285 | 1196.51  | 1150.285 | 1149.92955 |
| 7                       | 705.5  | 177.45     | 1.156       | 848.846  | 986.054  | 899.101    | 808.219  | 860.824  | 817.83107  | 1105.769 | 1210.036 | 1134.74445 |
| 8                       | 681.3  | 165.555    | 1.317       | 644.246  | 610.889  | 615.01615  | 1445.604 | 1388.299 | 1388.61247 | 720.755  | 722.502  | 707.19593  |
| 1-pentanol monomer      | 763.2  | 211.575    | 1.252       | 244.387  | 229.726  | 232.31537  | 200.131  | 206.316  | 199.15903  | 195.034  | 194.009  | 190.63107  |
| 10                      | 789.5  | 228.93     | 1.278       | 305.575  | 282.083  | 287.95242  | 288.16   | 296.775  | 286.61815  | 253.992  | 245.031  | 244.52127  |
| 1-hexanol monomer       | 871.8  | 287.81998  | 1.324       | 500.808  | 476.783  | 479.01959  | 505.182  | 479.232  | 482.36286  | 460.714  | 450.868  | 446.67518  |
| 12                      | 910.5  | 323.895    | 1.285       | 390.61   | 394.216  | 384.56474  | 408.446  | 407.643  | 399.88361  | 382.067  | 371      | 369.00283  |
| 13                      | 827.8  | 254.67     | 1.298       | 189.07   | 185.816  | 183.69414  | 130.629  | 115.02   | 120.36801  | 132.326  | 129.424  | 128.2575   |
| 14                      | 650.2  | 153.465    | 1.407       | 1546.534 | 1348.271 | 1418.45445 | 918.884  | 889.841  | 886.27525  | 955.2    | 899.329  | 908.71921  |
| 15                      | 691.9  | 170.235    | 1.417       | 119.448  | 116.362  | 115.5469   | 70.958   | 63.294   | 65.78348   | 84.791   | 77.105   | 79.32904   |
| Butyl acetate dimer     | 801.8  | 236.92499  | 1.615       | 1107.386 | 1039.135 | 1051.79529 | 1000.274 | 987.469  | 973.99407  | 1172.501 | 1144.664 | 1135.41085 |
| 17                      | 951.5  | 371.47498  | 1.331       | 53.375   | 51.069   | 51.17756   | 46.026   | 48.176   | 46.15898   | 48.544   | 51.656   | 49.098     |
| 1-hexanol dimer         | 869.1  | 285.675    | 1.654       | 102.535  | 81.102   | 89.98213   | 85.603   | 89.352   | 85.72795   | 88.448   | 84.873   | 84.92729   |
| 19                      | 874.7  | 290.16     | 1.703       | 573.215  | 493.119  | 522.50366  | 654.39   | 660.144  | 644.12166  | 680.515  | 694.865  | 673.9362   |
| Ethyl valerate dimer    | 893.5  | 305.955    | 1.681       | 2559.814 | 2313.111 | 2387.73325 | 2716.428 | 2761.819 | 2684.34103 | 2862.844 | 2944.409 | 2845.55397 |
| 21                      | 908.4  | 321.555    | 1.713       | 575.191  | 575.578  | 563.87681  | 760.379  | 840.32   | 784.34251  | 799.157  | 810.122  | 788.54671  |
| 22                      | 1004.3 | 444.99     | 1.686       | 70.84    | 60.189   | 64.20421   | 48.703   | 60.95    | 53.72997   | 47.348   | 40.846   | 43.21506   |
| 1-octen-3-one           | 979.3  | 407.745    | 1.275       | 48.592   | 51.555   | 49.07203   | 50.438   | 47.072   | 47.7799    | 54.504   | 53.432   | 52.88864   |
| 24                      | 968.5  | 393.31497  | 1.211       | 19.98    | 26.302   | 22.67818   | 27.818   | 24.853   | 25.80879   | 29.192   | 22.331   | 25.24627   |
| 25                      | 941.6  | 359.38498  | 1.207       | 27.885   | 24.913   | 25.87102   | 23.784   | 23.454   | 23.14662   | 28.234   | 30.359   | 28.71057   |
| 26                      | 1045.1 | 520.45496  | 1.205       | 279.609  | 239.099  | 254.16692  | 253.909  | 233.554  | 238.85687  | 223.15   | 236.834  | 225.39216  |
| 27                      | 1063.6 | 558.675    | 1.187       | 307.119  | 285.156  | 290.21475  | 299.005  | 302.901  | 294.93394  | 260.843  | 238.427  | 244.6423   |
| Methyl benzoate monomer | 1095.1 | 630.435    | 1.226       | 1700.963 | 1546.432 | 1591.22355 | 1515.321 | 1433.268 | 1444.80861 | 1345.28  | 1370.751 | 1330.85519 |
| Methyl benzoate dimer   | 1090.2 | 618.735    | 1.6         | 850.353  | 774      | 795.93297  | 682.855  | 614.918  | 635.90877  | 613.569  | 603.819  | 596.52012  |



| Compound                 | RI     | Rt [sec]  | Dt [RIPrel] | H3-1     | H3-2     | H3-3       | H4-1     | H4-2     | H4-3       | H5-1     | H5-2     | H5-3       |
|--------------------------|--------|-----------|-------------|----------|----------|------------|----------|----------|------------|----------|----------|------------|
| Ethyl hexanoate monomer  | 1002.3 | 441.675   | 1.342       | 254.055  | 232.041  | 238.18704  | 339.74   | 349.408  | 337.68252  | 275.669  | 289.474  | 276.92007  |
| 31                       | 982.4  | 412.03497 | 1.386       | 114.582  | 104.143  | 107.17525  | 125.7    | 121.726  | 121.23874  | 127.47   | 114.468  | 118.54962  |
| 32                       | 1027.5 | 486.525   | 1.261       | 44.89    | 39.863   | 41.52897   | 51.355   | 53.239   | 51.25106   | 34.534   | 35.974   | 34.54892   |
| 33                       | 915.4  | 329.15997 | 1.327       | 138.363  | 121.453  | 127.30984  | 123.965  | 129.687  | 124.28948  | 150.749  | 142.071  | 143.4818   |
| 34                       | 759.5  | 209.23499 | 1.298       | 132.98   | 131.295  | 129.49475  | 125.405  | 111.023  | 115.84972  | 117.957  | 133.709  | 123.31634  |
| Ethyl hexanoate dimer    | 999.9  | 437.58    | 1.818       | 92.607   | 74.748   | 82.00395   | 137.04   | 151.171  | 141.22339  | 124.098  | 108.949  | 114.19303  |
| 36                       | 690.8  | 169.65    | 1.18        | 393.087  | 331.401  | 354.99912  | 277.978  | 260.447  | 263.82825  | 320.623  | 336.996  | 322.23331  |
| 37                       | 807.4  | 240.62999 | 1.82        | 37.658   | 46.876   | 41.42166   | 35.117   | 35.631   | 34.66652   | 34.413   | 32.364   | 32.72073   |
| 38                       | 1109.8 | 666.89996 | 1.26        | 118.021  | 108.695  | 111.09084  | 118.35   | 100.178  | 107.07872  | 111.623  | 116.032  | 111.55095  |
| 39                       | 1299   | 1377.87   | 1.213       | 656.455  | 650.691  | 640.50154  | 607.467  | 570.294  | 577.10289  | 609.519  | 588.818  | 587.18513  |
| 40                       | 861.4  | 279.63    | 0.951       | 509.864  | 508.357  | 498.92829  | 486.781  | 466.23   | 466.97539  | 422.758  | 404.474  | 405.34368  |
| 41                       | 1047.2 | 524.55    | 1.266       | 1408.492 | 1186.198 | 1271.3981  | 1100.719 | 1080.605 | 1068.84876 | 879.529  | 808.889  | 827.32482  |
| phenylacetaldehyde dimer | 1040.5 | 511.28998 | 1.541       | 167.992  | 137.024  | 149.45784  | 124.948  | 112.466  | 116.33286  | 74.704   | 68.388   | 70.11508   |
| n-Nonanal monomer        | 1104.2 | 652.86    | 1.499       | 1149.028 | 1017.394 | 1061.54678 | 1216.922 | 1140.445 | 1155.10983 | 1164.955 | 1149.492 | 1134.07903 |
| n-Nonanal dimer          | 1103   | 649.74    | 1.937       | 488.52   | 419.123  | 444.74507  | 555.541  | 519.77   | 526.90239  | 603.302  | 582.865  | 581.22183  |
| 45                       | 1004.5 | 445.37997 | 1.426       | 151.4    | 111.505  | 128.82345  | 134.467  | 127.264  | 128.24819  | 114.325  | 107.306  | 108.59919  |
| 46                       | 827    | 254.08499 | 1.389       | 49.604   | 43.31    | 45.52786   | 36.478   | 39.796   | 37.37426   | 40.104   | 35.872   | 37.22824   |
| 47                       | 902.9  | 315.705   | 1.349       | 42.492   | 47.85    | 44.26758   | 47.428   | 48.992   | 47.2458    | 45.883   | 42.505   | 43.31012   |
| 48                       | 820.6  | 249.59999 | 1.414       | 169.987  | 180.934  | 171.95129  | 161.937  | 155.317  | 155.45446  | 142.949  | 131.096  | 134.28205  |
| 49                       | 901.2  | 313.94998 | 1.446       | 60.043   | 67.557   | 62.524     | 61.569   | 47.009   | 53.20322   | 62.092   | 67.25    | 63.37758   |
| 50                       | 888    | 301.08    | 1.361       | 27.32    | 39.583   | 32.78247   | 30.105   | 28.653   | 28.79142   | 35.714   | 31.381   | 32.87655   |
| ethanol                  | 484.9  | 102.57    | 1.047       | 1402.357 | 1318.302 | 1333.12291 | 1238.105 | 1168.368 | 1179.17177 | 1163.88  | 1080.507 | 1099.74963 |
| Furfurol monomer         | 829.7  | 256.035   | 1.08        | 696.73   | 674.297  | 671.80323  | 708.403  | 707.277  | 693.6832   | 647.681  | 631.834  | 626.96235  |
| 53                       | 908    | 321.16498 | 1.575       | 115.642  | 110.547  | 110.83261  | 99.001   | 84.372   | 89.85277   | 87.988   | 89.447   | 86.94315   |
| 54                       | 893.9  | 306.345   | 1.564       | 165.404  | 197.787  | 177.96359  | 213.853  | 224.993  | 215.03454  | 183.037  | 169.102  | 172.54811  |
| 55                       | 814.3  | 245.31    | 1.475       | 199.671  | 200.014  | 195.84565  | 189.207  | 173.404  | 177.67939  | 151.263  | 137.376  | 141.43311  |
| 56                       | 782.5  | 224.44499 | 1.446       | 376.742  | 384.605  | 373.06003  | 394.451  | 382.768  | 380.83731  | 374.207  | 361.567  | 360.52926  |
| 57                       | 781.4  | 223.665   | 1.415       | 294.52   | 303.51   | 293.0347   | 317.99   | 291.535  | 298.66725  | 303.535  | 307.018  | 299.17097  |
| 58                       | 732.4  | 192.65999 | 1.312       | 52.065   | 60.465   | 55.1397    | 77.749   | 94.646   | 84.47355   | 54.327   | 54.168   | 53.16255   |
| 59                       | 756.4  | 207.28499 | 1.449       | 92.188   | 98.361   | 93.36901   | 81.171   | 93.542   | 85.60937   | 86.275   | 76.388   | 79.70487   |

| Compound                      | RI     | Rt [sec]  | Dt [RIPrel] | H3-1     | H3-2     | H3-3       | H4-1     | H4-2     | H4-3       | H5-1     | H5-2     | H5-3       |
|-------------------------------|--------|-----------|-------------|----------|----------|------------|----------|----------|------------|----------|----------|------------|
| 60                            | 783.9  | 225.42    | 1.522       | 109.082  | 202.957  | 152.89911  | 188.134  | 226.16   | 203.00406  | 213.453  | 220.197  | 212.4885   |
| 1-pentanol dimer              | 759.5  | 209.23499 | 1.52        | 106.811  | 85.07    | 94.02169   | 75.459   | 70.228   | 71.38663   | 81.984   | 78.678   | 78.72438   |
| Acetic acid                   | 574.9  | 127.725   | 1.061       | 1169.494 | 1278.877 | 1199.70179 | 1232.04  | 1320.199 | 1250.59711 | 1373.149 | 1375.976 | 1347.07125 |
| 63                            | 812.6  | 244.13998 | 1.282       | 111.134  | 112.891  | 109.77225  | 106.205  | 113.51   | 107.66035  | 109.773  | 94.716   | 100.19961  |
| 64                            | 788.5  | 228.34499 | 1.557       | 2158.727 | 2226.554 | 2148.78769 | 2284.44  | 2277.585 | 2235.39225 | 2472.013 | 2384.392 | 2379.63845 |
| Z-3-hexen-1-ol dimer          | 845    | 267.15    | 1.507       | 74.079   | 77.904   | 74.47167   | 75.103   | 87.271   | 79.56326   | 107.746  | 90.082   | 96.93572   |
| 66                            | 989.4  | 421.78497 | 1.247       | 384.278  | 364.257  | 366.78215  | 452.714  | 431.934  | 433.47752  | 431.275  | 408.95   | 411.71025  |
| Ethyl lactate dimer           | 811.7  | 243.555   | 1.539       | 149.934  | 173.508  | 158.48658  | 140.57   | 152.262  | 143.48768  | 142.378  | 128.456  | 132.70866  |
| Benzaldehyde dimer            | 961.2  | 383.75998 | 1.464       | 1775.971 | 1666.286 | 1686.70593 | 1621.279 | 1596.315 | 1576.62106 | 1223.215 | 1141.524 | 1158.72211 |
| Furfurol dimer                | 829.7  | 256.035   | 1.329       | 1447.66  | 1441.598 | 1415.73642 | 1788.951 | 1800.729 | 1758.9432  | 1425.735 | 1324.932 | 1347.82683 |
| 70                            | 1002.2 | 441.47998 | 1.467       | 189.955  | 201.882  | 192.00013  | 320.448  | 347.822  | 327.4523   | 332.156  | 374.191  | 346.11003  |
| Phenylacetaldehyde<br>monomer | 1045.9 | 522.01495 | 1.24        | 1122.174 | 1118.346 | 1097.8548  | 1124.718 | 1052.616 | 1066.89366 | 982.701  | 971.885  | 957.74714  |
| 72                            | 1092.3 | 623.61    | 1.363       | 931.683  | 1019.963 | 956.30654  | 1034.304 | 1023.982 | 1008.56014 | 1155.487 | 1172.251 | 1140.59162 |
| 73                            | 1103.1 | 649.935   | 1.529       | 573.066  | 586.284  | 568.0815   | 679.972  | 687.338  | 669.9819   | 820.796  | 821.913  | 804.92741  |
| 74                            | 712.6  | 181.34999 | 1.081       | 75.059   | 87.798   | 79.79993   | 93.095   | 97.434   | 93.35921   | 92.026   | 98.529   | 93.37195   |
| 75                            | 827.5  | 254.47499 | 1.272       | 90.037   | 96.822   | 91.56091   | 56.078   | 52.465   | 53.18607   | 68.049   | 68.214   | 66.76887   |
| Ethyl lactate monomer         | 814.3  | 245.31    | 1.141       | 129.142  | 114.953  | 119.60655  | 108.463  | 112.485  | 108.26452  | 90.51    | 84.886   | 85.94404   |
| 77                            | 845    | 267.15    | 1.184       | 430.831  | 521.496  | 466.64023  | 575.908  | 611.86   | 582.00632  | 656.423  | 714.28   | 671.64447  |
| Butyl acetate monomer         | 805.9  | 239.655   | 1.239       | 530.619  | 554.789  | 531.84992  | 521.648  | 530.999  | 515.79703  | 597.154  | 626.654  | 599.66592  |
| Ethyl valerate monomer        | 896.5  | 309.07498 | 1.26        | 608.929  | 574.611  | 579.9346   | 565.155  | 551.807  | 547.31138  | 516.316  | 498.407  | 497.21427  |
| Benzaldehyde monomer          | 960.1  | 382.395   | 1.148       | 1027.668 | 956.961  | 972.46821  | 923.588  | 991.291  | 938.29071  | 838.563  | 822.278  | 813.81209  |
| 81                            | 982.1  | 411.645   | 1.45        | 178.552  | 184.36   | 177.82688  | 246.338  | 257.757  | 247.00655  | 299.113  | 313.33   | 300.09707  |
| 82                            | 982.4  | 412.03497 | 1.476       | 106.351  | 99.712   | 100.97087  | 136.187  | 146.594  | 138.56269  | 157.487  | 139.952  | 145.74511  |
| 83                            | 733.1  | 193.04999 | 1.335       | 46.219   | 43.634   | 44.02797   | 64.369   | 98.097   | 79.60834   | 37.69    | 33.252   | 34.76158   |
| 84                            | 753.6  | 205.53    | 1.345       | 104.352  | 89.343   | 94.91055   | 147.419  | 151.999  | 146.71482  | 109.129  | 85.86    | 95.54461   |
| 85                            | 876.9  | 291.91498 | 1.395       | 136.84   | 147.517  | 139.33493  | 152.668  | 169.182  | 157.7065   | 218.51   | 275.393  | 242.01247  |
| 86                            | 958.6  | 380.44498 | 1.383       | 210.205  | 216.724  | 209.19521  | 215.328  | 261.896  | 233.83976  | 309.159  | 323.42   | 309.96371  |
| 87                            | 961.7  | 384.34497 | 1.289       | 505.449  | 562.973  | 523.52678  | 572.353  | 573.488  | 561.46209  | 674.741  | 686.126  | 666.82483  |
| 88                            | 1144.4 | 761.67    | 1.406       | 217.713  | 195.896  | 202.66841  | 261.005  | 261.763  | 256.15632  | 311.021  | 301.838  | 300.30091  |

| Compound                | RI     | Rt [sec]  | Dt [RIPrel] | H3-1     | H3-2     | H3-3       | H4-1     | H4-2     | H4-3       | H5-1     | H5-2    | H5-3       |
|-------------------------|--------|-----------|-------------|----------|----------|------------|----------|----------|------------|----------|---------|------------|
| 89                      | 1144.5 | 762.06    | 1.539       | 127.159  | 155.666  | 138.58425  | 181.476  | 205.552  | 189.64372  | 273.414  | 254.004 | 258.43482  |
| 90                      | 1104.1 | 652.47    | 1.586       | 219.927  | 231.724  | 221.30899  | 244.266  | 231.524  | 233.1371   | 250.877  | 258.94  | 249.81033  |
| E -2-octenal            | 1062.2 | 555.75    | 1.326       | 283.748  | 289.369  | 280.82733  | 340.803  | 330.253  | 328.81744  | 297.004  | 302.235 | 293.62711  |
| 92                      | 1059.8 | 550.68    | 1.46        | 135.644  | 150.889  | 140.40117  | 187.253  | 196.353  | 187.96694  | 189.939  | 193.222 | 187.74889  |
| 93                      | 1031.8 | 494.52    | 1.369       | 81.945   | 82.177   | 80.41978   | 93.78    | 99.572   | 94.74248   | 82.39    | 83.059  | 81.07001   |
| E 2-heptenal            | 959.5  | 381.615   | 1.665       | 178.812  | 158.835  | 165.44703  | 194.609  | 217.241  | 201.8065   | 186.78   | 190.859 | 185.04311  |
| 95                      | 961    | 383.56497 | 1.563       | 684.473  | 622.359  | 640.34768  | 673.742  | 680.8    | 663.72558  | 587.036  | 572.346 | 568.09718  |
| 96                      | 739.7  | 196.95    | 0.956       | 192.74   | 169.835  | 177.66175  | 95.227   | 115.952  | 103.47771  | 121.71   | 145.627 | 130.99513  |
| 97                      | 800    | 235.75499 | 1.586       | 177.302  | 207.626  | 188.61472  | 208.54   | 211.465  | 205.80245  | 247.096  | 223.674 | 230.6773   |
| 98                      | 569.2  | 125.96999 | 1.174       | 268.231  | 244.84   | 251.40479  | 266.308  | 251.958  | 253.95034  | 270.032  | 272.307 | 265.74611  |
| 99                      | 571.7  | 126.74999 | 1.214       | 139.159  | 137.528  | 135.57663  | 110.053  | 126.947  | 116.13     | 138.137  | 133.186 | 132.94827  |
| 100                     | 554.3  | 121.48499 | 1.196       | 160.199  | 175.932  | 164.70419  | 143.473  | 160.37   | 148.88307  | 144.764  | 146.416 | 142.6782   |
| 101                     | 717.2  | 183.885   | 1.394       | 75.145   | 40.836   | 56.83069   | 48.151   | 41.043   | 43.70506   | 39.783   | 43.374  | 40.74693   |
| 6-methyl-5-hepten-2-one | 992    | 425.49    | 1.17        | 174.473  | 172.807  | 170.1672   | 165.182  | 170.841  | 164.65127  | 179.136  | 174.086 | 173.07878  |
| 103                     | 984.7  | 415.155   | 1.15        | 258.102  | 250.363  | 249.14785  | 267.336  | 270.074  | 263.3309   | 198.83   | 188.934 | 190.00436  |
| 104                     | 787.3  | 227.56499 | 1.376       | 435.788  | 600.637  | 507.84825  | 532.16   | 647.339  | 577.95451  | 629.461  | 642.635 | 623.32704  |
| 105                     | 729.8  | 191.09999 | 1.51        | 159.758  | 133.56   | 143.72582  | 108.251  | 90.963   | 97.61486   | 96.118   | 139.644 | 115.52338  |
| 106                     | 913    | 326.625   | 1.412       | 175.459  | 210.126  | 188.93665  | 230.367  | 265.671  | 243.05862  | 307.9    | 331.287 | 313.20163  |
| 107                     | 898.4  | 311.025   | 1.387       | 172.795  | 229.364  | 197.05791  | 219.962  | 251.251  | 230.89437  | 296.179  | 303.154 | 293.67317  |
| 108                     | 891.3  | 303.81    | 1.645       | 163.402  | 179.922  | 168.22876  | 179.789  | 174.682  | 173.69079  | 174.774  | 166.666 | 167.3056   |
| Z-3-hexen-1-ol monomer  | 845.8  | 267.735   | 1.227       | 218.697  | 221.958  | 215.92095  | 238.255  | 245.963  | 237.26682  | 209.041  | 198.621 | 199.75438  |
| 110                     | 868.1  | 284.895   | 1.228       | 166.54   | 192.049  | 175.70861  | 196.62   | 216.15   | 202.2573   | 205.022  | 190.282 | 193.69896  |
| 111                     | 845.5  | 267.53998 | 1.418       | 206.611  | 210.621  | 204.44368  | 226.934  | 233.688  | 225.70478  | 212.898  | 188.357 | 196.61495  |
| 112                     | 965.9  | 389.805   | 1.237       | 96.924   | 118.925  | 105.76601  | 112.92   | 111.953  | 110.18777  | 140.231  | 140.57  | 137.59249  |
| 113                     | 415.4  | 86.579994 | 1.085       | 226.306  | 183.449  | 200.77995  | 209.244  | 165.553  | 183.65053  | 177.727  | 148.015 | 159.61358  |
| 114                     | 636.4  | 148.39499 | 1.365       | 339.823  | 281.696  | 304.54431  | 295.015  | 259.162  | 271.54673  | 231.715  | 223.981 | 223.29104  |
| Ethyl Acetate           | 597.4  | 134.94    | 1.331       | 2552.54  | 2353.77  | 2404.0919  | 3589.844 | 3288.508 | 3370.39248 | 2555.214 | 2372.39 | 2414.52596 |
| 116                     | 582.9  | 130.26    | 1.286       | 1212.088 | 1076.091 | 1121.20771 | 1013.454 | 907.608  | 941.32038  | 869.442  | 811.734 | 823.77624  |
| 117                     | 569.8  | 126.16499 | 1.243       | 714.902  | 684.311  | 685.61437  | 531.903  | 518.955  | 514.92042  | 480.615  | 471.071 | 466.32614  |

Table 5 GC-IMS data for samples H6-H8

| Compound                | RI     | Rt [sec]   | Dt [RIPrel] | H6-1     | H6-2     | H6-3       | H7-1     | H7-2     | H7-3       | H8-1     | H8-2     | H8-3       |
|-------------------------|--------|------------|-------------|----------|----------|------------|----------|----------|------------|----------|----------|------------|
| 1                       | 531.3  | 114.854996 | 1.119       | 1604.785 | 1824.376 | 1680.28889 | 2027.219 | 1579.697 | 1767.38884 | 1859.74  | 1461.201 | 1627.26109 |
| 2                       | 532.7  | 115.244995 | 1.094       | 1393.818 | 1464.192 | 1400.4249  | 1328.951 | 1390.973 | 1332.76276 | 1472.823 | 1464.522 | 1439.29905 |
| 3                       | 540.3  | 117.39     | 1.147       | 478.439  | 560.54   | 509.09971  | 482.48   | 465.361  | 464.44209  | 530.079  | 487.746  | 498.73425  |
| 4                       | 670    | 161.06999  | 1.23        | 269.614  | 231.734  | 245.66052  | 224.841  | 244.139  | 229.8002   | 255.365  | 258.578  | 251.83207  |
| 5                       | 728.4  | 190.31999  | 1.247       | 42.67    | 48.547   | 44.69633   | 81.197   | 77.219   | 77.62384   | 72.188   | 52.294   | 60.99618   |
| 6                       | 696    | 172.37999  | 1.205       | 1099.177 | 1053.738 | 1054.92835 | 896.049  | 924.895  | 892.26256  | 1072.298 | 1078.734 | 1054.00568 |
| 7                       | 705.5  | 177.45     | 1.156       | 1124.798 | 1201.471 | 1139.87181 | 1127.716 | 1038.3   | 1061.34784 | 1265.666 | 1235.707 | 1225.67277 |
| 8                       | 681.3  | 165.555    | 1.317       | 564.73   | 527.916  | 535.39654  | 537.013  | 498.42   | 507.36217  | 698.528  | 612.158  | 642.23614  |
| 1-pentanol monomer      | 763.2  | 211.575    | 1.252       | 198.913  | 198.551  | 194.75736  | 235.734  | 233.155  | 229.75561  | 188.141  | 184.008  | 182.35301  |
| 10                      | 789.5  | 228.93     | 1.278       | 221.859  | 236.108  | 224.40383  | 252.412  | 252.098  | 247.2099   | 269.966  | 243.54   | 251.61794  |
| 1-hexanol monomer       | 871.8  | 287.81998  | 1.324       | 540.509  | 547.582  | 533.16459  | 484.796  | 519.139  | 491.92815  | 529.68   | 476.558  | 493.05662  |
| 12                      | 910.5  | 323.895    | 1.285       | 443.027  | 395.463  | 410.8601   | 384.389  | 409.93   | 389.21631  | 405.121  | 386.867  | 388.07412  |
| 13                      | 827.8  | 254.67     | 1.298       | 117.545  | 104.07   | 108.59135  | 122.788  | 135.911  | 126.76251  | 134.106  | 133.757  | 131.25287  |
| 14                      | 650.2  | 153.465    | 1.407       | 1055.93  | 877.464  | 947.36306  | 1040.676 | 1247.563 | 1121.23711 | 992.1    | 1018.428 | 985.15872  |
| 15                      | 691.9  | 170.235    | 1.417       | 92.239   | 89.961   | 89.278     | 150.867  | 147.936  | 146.41347  | 105.789  | 98.313   | 100.00998  |
| Butyl acetate dimer     | 801.8  | 236.92499  | 1.615       | 2049.569 | 1836.188 | 1904.02093 | 1581.759 | 1596.909 | 1557.54732 | 1846.447 | 1608.432 | 1692.89071 |
| 17                      | 951.5  | 371.47498  | 1.331       | 79.056   | 65.143   | 70.65751   | 57.781   | 61.01    | 58.20759   | 65.467   | 62.587   | 62.74646   |
| 1-hexanol dimer         | 869.1  | 285.675    | 1.654       | 142.156  | 129.817  | 133.26677  | 107.639  | 123.007  | 113.01654  | 124.428  | 105.983  | 112.90139  |
| 19                      | 874.7  | 290.16     | 1.703       | 1822.19  | 1583.021 | 1668.55339 | 1191.787 | 1327.368 | 1234.38595 | 1566.277 | 1201.005 | 1355.96818 |
| Ethyl valerate dimer    | 893.5  | 305.955    | 1.681       | 4572.723 | 4326.878 | 4360.80449 | 3711.008 | 4012.082 | 3784.3141  | 4261.55  | 3766.42  | 3933.7053  |
| 21                      | 908.4  | 321.555    | 1.713       | 2115.578 | 1852.772 | 1944.4915  | 1379.785 | 1523.369 | 1422.54546 | 1725.486 | 1327.831 | 1496.12533 |
| 22                      | 1004.3 | 444.99     | 1.686       | 62.292   | 48.065   | 54.07493   | 51.469   | 49.391   | 49.4214    | 54.882   | 45.404   | 49.14014   |
| 1-octen-3-one           | 979.3  | 407.745    | 1.275       | 48.16    | 56.271   | 51.17119   | 63.097   | 74.399   | 67.37304   | 46.486   | 49.54    | 47.05274   |
| 24                      | 968.5  | 393.31497  | 1.211       | 27.222   | 31.26    | 28.65618   | 30.705   | 24.951   | 27.27144   | 25.636   | 28.818   | 26.68246   |
| 25                      | 941.6  | 359.38498  | 1.207       | 30.248   | 31.463   | 30.23839   | 33.925   | 33.607   | 33.09068   | 32.25    | 34.997   | 32.95103   |
| 26                      | 1045.1 | 520.45496  | 1.205       | 215.198  | 206.637  | 206.69915  | 215.204  | 191.557  | 199.31289  | 227.639  | 187.062  | 203.20349  |
| 27                      | 1063.6 | 558.675    | 1.187       | 264.094  | 258.036  | 255.8437   | 245.592  | 273.23   | 254.22278  | 258.163  | 237.424  | 242.83763  |
| Methyl benzoate monomer | 1095.1 | 630.435    | 1.226       | 1288.565 | 1318.14  | 1277.28545 | 1126.501 | 1150.735 | 1115.84564 | 1262.063 | 1100.386 | 1157.60001 |
| Methyl benzoate dimer   | 1090.2 | 618.735    | 1.6         | 563.119  | 600.304  | 570.07727  | 469.161  | 439.677  | 445.33062  | 508.573  | 414.19   | 452.15387  |

| Compound                 | RI     | Rt [sec]  | Dt [RIPrel] | H6-1     | H6-2     | H6-3       | H7-1     | H7-2     | H7-3       | H8-1    | H8-2     | H8-3       |
|--------------------------|--------|-----------|-------------|----------|----------|------------|----------|----------|------------|---------|----------|------------|
| Ethyl hexanoate monomer  | 1002.3 | 441.675   | 1.342       | 773.153  | 669.26   | 706.78237  | 415.554  | 545.156  | 470.7479   | 570.367 | 438.504  | 494.34679  |
| 31                       | 982.4  | 412.03497 | 1.386       | 144.316  | 130.433  | 134.62701  | 132.203  | 127.064  | 127.04083  | 126.014 | 121.221  | 121.14515  |
| 32                       | 1027.5 | 486.525   | 1.261       | 51.447   | 43.675   | 46.60978   | 64.42    | 62.46    | 62.1712    | 42.825  | 41.173   | 41.15902   |
| 33                       | 915.4  | 329.15997 | 1.327       | 136.916  | 157.42   | 144.22464  | 149.959  | 150.556  | 147.25235  | 137.861 | 144.583  | 138.39756  |
| 34                       | 759.5  | 209.23499 | 1.298       | 128.713  | 127.245  | 125.41942  | 127.286  | 129.161  | 125.65903  | 121.193 | 123.467  | 119.8834   |
| Ethyl hexanoate dimer    | 999.9  | 437.58    | 1.818       | 769.616  | 549.727  | 646.47807  | 252.101  | 436.324  | 337.32825  | 487.051 | 301.01   | 386.14989  |
| 36                       | 690.8  | 169.65    | 1.18        | 405.908  | 390.124  | 390.05568  | 356.282  | 438.751  | 389.56617  | 390.813 | 404.316  | 389.61321  |
| 37                       | 807.4  | 240.62999 | 1.82        | 34.727   | 33.233   | 33.3004    | 34.778   | 30.6     | 32.03522   | 30.714  | 30.889   | 30.18547   |
| 38                       | 1109.8 | 666.89996 | 1.26        | 109.269  | 101.26   | 103.15921  | 94.83    | 104.229  | 97.53891   | 95.001  | 99.366   | 95.23983   |
| 39                       | 1299   | 1377.87   | 1.213       | 521.201  | 635.662  | 566.86287  | 487.863  | 528.626  | 498.07961  | 537.778 | 496.44   | 506.76682  |
| 40                       | 861.4  | 279.63    | 0.951       | 500.688  | 499.828  | 490.25284  | 407.681  | 365.272  | 378.74697  | 426.821 | 446.681  | 428.01598  |
| 41                       | 1047.2 | 524.55    | 1.266       | 925.847  | 848.304  | 869.33399  | 636.823  | 570.129  | 591.40648  | 607.365 | 588.368  | 585.90917  |
| phenylacetaldehyde dimer | 1040.5 | 511.28998 | 1.541       | 90.7     | 75.056   | 81.22044   | 57.807   | 44.497   | 50.12896   | 55.989  | 52.551   | 53.1846    |
| n-Nonanal monomer        | 1104.2 | 652.86    | 1.499       | 1230.216 | 1157.821 | 1170.13813 | 1077.462 | 1128.154 | 1080.75184 | 1023.5  | 937.926  | 961.09874  |
| n-Nonanal dimer          | 1103   | 649.74    | 1.937       | 744.361  | 620.469  | 668.7667   | 502.492  | 509.195  | 495.72663  | 421.927 | 370.49   | 388.28433  |
| 45                       | 1004.5 | 445.37997 | 1.426       | 121.132  | 123.673  | 119.95445  | 151.45   | 152.668  | 149.01782  | 127.324 | 114.052  | 118.27424  |
| 46                       | 827    | 254.08499 | 1.389       | 29.236   | 32.424   | 30.2134    | 36.453   | 44.332   | 39.58465   | 31.152  | 33.081   | 31.47417   |
| 47                       | 902.9  | 315.705   | 1.349       | 27.159   | 23.026   | 24.59065   | 33.506   | 26.055   | 29.18489   | 29.63   | 20.307   | 24.46913   |
| 48                       | 820.6  | 249.59999 | 1.414       | 128.602  | 134.531  | 128.93517  | 98.681   | 100.93   | 97.80939   | 95.144  | 92.14    | 91.76916   |
| 49                       | 901.2  | 313.94998 | 1.446       | 38.054   | 38.384   | 37.45462   | 36.361   | 37.322   | 36.10467   | 36.082  | 35.181   | 34.91887   |
| 50                       | 888    | 301.08    | 1.361       | 36.849   | 40.259   | 37.78292   | 45.22    | 42.299   | 42.88431   | 41.02   | 36.215   | 37.84515   |
| ethanol                  | 484.9  | 102.57    | 1.047       | 1253.2   | 1029.441 | 1118.49409 | 953.963  | 1149.174 | 1030.53713 | 1173.78 | 1267.566 | 1196.25954 |
| Furfurol monomer         | 829.7  | 256.035   | 1.08        | 606.093  | 580.279  | 581.32228  | 638.225  | 678.005  | 644.9527   | 633.103 | 628.976  | 618.41871  |
| 53                       | 908    | 321.16498 | 1.575       | 109.098  | 97.304   | 101.13698  | 113.926  | 117.079  | 113.19245  | 113.605 | 110.335  | 109.7306   |
| 54                       | 893.9  | 306.345   | 1.564       | 140.827  | 138.788  | 137.01135  | 117.872  | 109.602  | 111.46226  | 90.427  | 102.506  | 94.53717   |
| 55                       | 814.3  | 245.31    | 1.475       | 159.339  | 140.551  | 146.9461   | 132.231  | 131.429  | 129.1934   | 142.315 | 125.243  | 131.10342  |
| 56                       | 782.5  | 224.44499 | 1.446       | 395.869  | 354.065  | 367.46766  | 344.232  | 347.518  | 338.9575   | 314.85  | 332.974  | 317.43376  |
| 57                       | 781.4  | 223.665   | 1.415       | 311.214  | 308.236  | 303.5305   | 313.34   | 319.763  | 310.22047  | 282.378 | 287.18   | 279.08342  |
| 58                       | 732.4  | 192.65999 | 1.312       | 36.979   | 43.786   | 39.57485   | 68.534   | 46.987   | 56.60529   | 54.435  | 41.826   | 47.16789   |
| 59                       | 756.4  | 207.28499 | 1.449       | 121.107  | 108.673  | 112.5922   | 98.637   | 84.334   | 89.65579   | 74.812  | 71.446   | 71.66642   |

| Compound                      | RI     | Rt [sec]  | Dt [RIPrel] | H6-1     | H6-2     | H6-3       | H7-1     | H7-2     | H7-3       | H8-1     | H8-2     | H8-3       |
|-------------------------------|--------|-----------|-------------|----------|----------|------------|----------|----------|------------|----------|----------|------------|
| 60                            | 783.9  | 225.42    | 1.522       | 168.677  | 215.119  | 188.06004  | 238.36   | 147.882  | 189.25858  | 182.022  | 123.289  | 149.60239  |
| 1-pentanol dimer              | 759.5  | 209.23499 | 1.52        | 92.911   | 83.36    | 86.37279   | 88.426   | 92.692   | 88.74782   | 61.096   | 61.429   | 60.03725   |
| Acetic acid                   | 574.9  | 127.725   | 1.061       | 1096.573 | 1357.099 | 1202.29928 | 1255.062 | 998.197  | 1104.09691 | 1310.442 | 1156.797 | 1208.94711 |
| 63                            | 812.6  | 244.13998 | 1.282       | 94.018   | 94.427   | 92.33805   | 82.114   | 75.259   | 77.11277   | 69.695   | 69.993   | 68.44712   |
| 64                            | 788.5  | 228.34499 | 1.557       | 2176.801 | 2170.625 | 2130.23874 | 2082.713 | 1933.711 | 1968.04776 | 1856.438 | 1736.032 | 1760.3103  |
| Z-3-hexen-1-ol dimer          | 845    | 267.15    | 1.507       | 113.745  | 105.136  | 107.25169  | 79.836   | 73.904   | 75.3326    | 77.187   | 57.55    | 66.02113   |
| 66                            | 989.4  | 421.78497 | 1.247       | 492.066  | 454.487  | 463.81097  | 486.315  | 467.689  | 467.46196  | 440.546  | 388.513  | 406.23891  |
| Ethyl lactate dimer           | 811.7  | 243.555   | 1.539       | 172.744  | 162.679  | 164.35727  | 146.391  | 110.405  | 125.83004  | 122.024  | 112.045  | 114.69381  |
| Benzaldehyde dimer            | 961.2  | 383.75998 | 1.464       | 1245.34  | 1179.876 | 1188.35584 | 1392.203 | 1384.756 | 1360.70991 | 1147.718 | 1076.758 | 1089.99324 |
| Furfurol dimer                | 829.7  | 256.035   | 1.329       | 1364.889 | 1251.348 | 1281.95613 | 1589.863 | 1604.95  | 1565.45837 | 1398.135 | 1412.733 | 1377.32532 |
| 70                            | 1002.2 | 441.47998 | 1.467       | 781.882  | 787.49   | 768.99228  | 628.411  | 776.483  | 688.39806  | 791.303  | 759.754  | 760.01793  |
| Phenylacetaldehyde<br>monomer | 1045.9 | 522.01495 | 1.24        | 1080.688 | 1121.128 | 1078.88984 | 809.006  | 779.659  | 778.44585  | 764.135  | 819.261  | 775.86404  |
| 72                            | 1092.3 | 623.61    | 1.363       | 1154.532 | 1193.862 | 1150.71306 | 1119.745 | 1180.377 | 1127.05978 | 1205.274 | 1262.04  | 1208.98386 |
| 73                            | 1103.1 | 649.935   | 1.529       | 939.603  | 880.138  | 891.67309  | 881.962  | 866.115  | 856.55773  | 815.277  | 861.106  | 821.42767  |
| 74                            | 712.6  | 181.34999 | 1.081       | 95.411   | 88.464   | 90.09875   | 92.626   | 69.479   | 79.43145   | 87.966   | 79.484   | 82.0505    |
| 75                            | 827.5  | 254.47499 | 1.272       | 57.778   | 58.923   | 57.18349   | 64.915   | 63.789   | 63.06496   | 64.135   | 69.223   | 65.34542   |
| Ethyl lactate monomer         | 814.3  | 245.31    | 1.141       | 87.607   | 99.439   | 91.65254   | 80.594   | 72.931   | 75.22725   | 88.975   | 71.494   | 78.62981   |
| 77                            | 845    | 267.15    | 1.184       | 717.947  | 806.341  | 746.90112  | 915.189  | 879.015  | 879.15996  | 850.359  | 879.11   | 847.43981  |
| Butyl acetate monomer         | 805.9  | 239.655   | 1.239       | 773.508  | 783.072  | 762.7242   | 753.807  | 800.911  | 761.81182  | 814.227  | 837.418  | 809.30605  |
| Ethyl valerate monomer        | 896.5  | 309.07498 | 1.26        | 433.495  | 426.881  | 421.58424  | 473.967  | 466.608  | 460.88175  | 466.268  | 467.845  | 457.71537  |
| Benzaldehyde monomer          | 960.1  | 382.395   | 1.148       | 790.291  | 752.056  | 755.75003  | 792.283  | 803.144  | 781.75923  | 750.695  | 708.187  | 714.85218  |
| 81                            | 982.1  | 411.645   | 1.45        | 356.327  | 327.623  | 335.1355   | 256.098  | 255.435  | 250.65117  | 251.47   | 264.964  | 253.05266  |
| 82                            | 982.4  | 412.03497 | 1.476       | 149.385  | 138.318  | 140.97447  | 83.084   | 86.453   | 83.07313   | 80.252   | 79.576   | 78.31572   |
| 83                            | 733.1  | 193.04999 | 1.335       | 42.682   | 35.901   | 38.50567   | 36.716   | 41.154   | 38.1563    | 37.614   | 47.881   | 41.89255   |
| 84                            | 753.6  | 205.53    | 1.345       | 110.043  | 94.291   | 100.12366  | 70.32    | 81.46    | 74.3722    | 100.089  | 84.207   | 90.30504   |
| 85                            | 876.9  | 291.91498 | 1.395       | 265.147  | 329.285  | 291.27168  | 351.835  | 347.791  | 342.81674  | 364.345  | 360.488  | 355.16817  |
| 86                            | 958.6  | 380.44498 | 1.383       | 302.12   | 323.154  | 306.38426  | 380.989  | 378.22   | 372.01241  | 370.182  | 394.746  | 374.81472  |
| 87                            | 961.7  | 384.34497 | 1.289       | 640.481  | 700.295  | 656.98024  | 715.248  | 718.448  | 702.51104  | 726.902  | 776.09   | 736.46608  |
| 88                            | 1144.4 | 761.67    | 1.406       | 316.718  | 297.559  | 300.99573  | 233.288  | 240.317  | 232.06645  | 225.529  | 210.212  | 213.51309  |

| Compound                | RI     | Rt [sec]  | Dt [RIPrel] | H6-1     | H6-2     | H6-3       | H7-1    | H7-2     | H7-3       | H8-1     | H8-2     | H8-3       |
|-------------------------|--------|-----------|-------------|----------|----------|------------|---------|----------|------------|----------|----------|------------|
| 89                      | 1144.5 | 762.06    | 1.539       | 265.341  | 261.785  | 258.29174  | 216.235 | 262.673  | 234.66492  | 210.83   | 237.754  | 219.80616  |
| 90                      | 1104.1 | 652.47    | 1.586       | 275.663  | 270.803  | 267.76834  | 235.283 | 220.222  | 223.19745  | 226.614  | 229.298  | 223.39688  |
| E -2-octenal            | 1062.2 | 555.75    | 1.326       | 381.208  | 374.068  | 370.08524  | 391.752 | 375.425  | 375.91673  | 361.522  | 356.244  | 351.70534  |
| 92                      | 1059.8 | 550.68    | 1.46        | 290.784  | 282      | 280.66416  | 341.827 | 319.176  | 323.89147  | 264.868  | 278.974  | 266.48258  |
| 93                      | 1031.8 | 494.52    | 1.369       | 121.64   | 107.388  | 112.22372  | 171.494 | 177.635  | 171.07321  | 142.953  | 147.653  | 142.39694  |
| E 2-heptenal            | 959.5  | 381.615   | 1.665       | 338.621  | 295.126  | 310.53603  | 340.318 | 369.281  | 347.70351  | 298.942  | 242.474  | 265.29384  |
| 95                      | 961    | 383.56497 | 1.563       | 667.719  | 594.388  | 618.43243  | 856.535 | 824.479  | 823.69686  | 632.601  | 595.727  | 601.88072  |
| 96                      | 739.7  | 196.95    | 0.956       | 161.138  | 178.152  | 166.2521   | 172.956 | 150.296  | 158.39348  | 167.104  | 167.421  | 163.91725  |
| 97                      | 800    | 235.75499 | 1.586       | 215.338  | 209.755  | 208.29557  | 206.094 | 177.435  | 187.92921  | 172.519  | 160.256  | 163.05975  |
| 98                      | 569.2  | 125.96999 | 1.174       | 262.267  | 276.849  | 264.16684  | 306.916 | 275.958  | 285.60826  | 300.772  | 247.873  | 268.83605  |
| 99                      | 571.7  | 126.74999 | 1.214       | 125.415  | 123.603  | 122.01882  | 113.358 | 125.107  | 116.84785  | 157.645  | 149.5    | 150.50105  |
| 100                     | 554.3  | 121.48499 | 1.196       | 141.57   | 134.972  | 135.50558  | 122.62  | 148.316  | 132.75864  | 146.502  | 158.54   | 149.47058  |
| 101                     | 717.2  | 183.885   | 1.394       | 49.258   | 37.309   | 42.41783   | 41.391  | 57.762   | 48.58497   | 39.472   | 58.444   | 47.97884   |
| 6-methyl-5-hepten-2-one | 992    | 425.49    | 1.17        | 186.041  | 182.419  | 180.5454   | 158.606 | 151.482  | 151.94312  | 144.897  | 147.993  | 143.5161   |
| 103                     | 984.7  | 415.155   | 1.15        | 215.506  | 201.292  | 204.23102  | 264.424 | 272.519  | 263.10207  | 210.402  | 182.006  | 192.27992  |
| 104                     | 787.3  | 227.56499 | 1.376       | 508.84   | 631.675  | 558.85235  | 607.435 | 441.996  | 514.22119  | 575.781  | 481.192  | 517.91677  |
| 105                     | 729.8  | 191.09999 | 1.51        | 146.787  | 130.734  | 135.98529  | 117.405 | 121.608  | 117.11637  | 111.842  | 98.037   | 102.84071  |
| 106                     | 913    | 326.625   | 1.412       | 333.913  | 377.573  | 348.62814  | 430.272 | 431.592  | 422.31336  | 431.322  | 471.968  | 442.6121   |
| 107                     | 898.4  | 311.025   | 1.387       | 171.764  | 225.884  | 194.84752  | 270.952 | 245.776  | 253.19672  | 239.759  | 282.838  | 256.07253  |
| 108                     | 891.3  | 303.81    | 1.645       | 187.503  | 176.871  | 178.54326  | 237.561 | 251.857  | 239.81482  | 219.448  | 211.712  | 211.2684   |
| Z-3-hexen-1-ol monomer  | 845.8  | 267.735   | 1.227       | 270.337  | 272.646  | 266.06167  | 214.817 | 216.797  | 211.49086  | 231.794  | 217.59   | 220.19816  |
| 110                     | 868.1  | 284.895   | 1.228       | 236.203  | 240.558  | 233.61289  | 218.129 | 198.78   | 204.28541  | 203.772  | 195.319  | 195.55459  |
| 111                     | 845.5  | 267.53998 | 1.418       | 209.117  | 195.522  | 198.27311  | 179.297 | 184.423  | 178.2228   | 155.365  | 154.524  | 151.84561  |
| 112                     | 965.9  | 389.805   | 1.237       | 135.333  | 163.402  | 146.38015  | 143.647 | 152.377  | 145.05176  | 173.09   | 194.577  | 180.15683  |
| 113                     | 415.4  | 86.579994 | 1.085       | 183.383  | 125.177  | 151.1944   | 79.69   | 179.599  | 127.05161  | 154.654  | 164.173  | 156.22523  |
| 114                     | 636.4  | 148.39499 | 1.365       | 293.588  | 221.586  | 252.43526  | 232.466 | 281.781  | 251.98103  | 229.535  | 222.224  | 221.36191  |
| Ethyl Acetate           | 597.4  | 134.94    | 1.331       | 3096.608 | 2542.643 | 2763.23299 | 2451.02 | 2827.191 | 2586.32339 | 2309.203 | 2343.252 | 2279.70295 |
| 116                     | 582.9  | 130.26    | 1.286       | 1005.873 | 750.774  | 860.75703  | 852.491 | 1233.182 | 1021.97977 | 965.008  | 1047.699 | 986.22643  |
| 117                     | 569.8  | 126.16499 | 1.243       | 502.121  | 425.822  | 454.69207  | 538.434 | 645.01   | 579.88756  | 543.297  | 571.065  | 546.03738  |

Table 6 GC-IMS data for sample H9

| Compound                | RI     | Rt [sec]   | Dt [RIPrel] | H9-1     | H9-2     | H9-3       |
|-------------------------|--------|------------|-------------|----------|----------|------------|
| 1                       | 531.3  | 114.854996 | 1.119       | 1773.123 | 1775.381 | 1738.76696 |
| 2                       | 532.7  | 115.244995 | 1.094       | 1926.955 | 1900.862 | 1875.63033 |
| 3                       | 540.3  | 117.39     | 1.147       | 591.619  | 546.383  | 557.62098  |
| 4                       | 670    | 161.06999  | 1.23        | 236.917  | 247.41   | 237.32023  |
| 5                       | 728.4  | 190.31999  | 1.247       | 63.944   | 68.652   | 64.97204   |
| 6                       | 696    | 172.37999  | 1.205       | 1009.359 | 1023.338 | 996.02153  |
| 7                       | 705.5  | 177.45     | 1.156       | 1273.882 | 1225.601 | 1224.74667 |
| 8                       | 681.3  | 165.555    | 1.317       | 690.805  | 629.147  | 646.77648  |
| 1-pentanol monomer      | 763.2  | 211.575    | 1.252       | 195.116  | 207.728  | 197.39356  |
| 10                      | 789.5  | 228.93     | 1.278       | 282.362  | 273.772  | 272.50566  |
| 1-hexanol monomer       | 871.8  | 287.81998  | 1.324       | 319.062  | 367.143  | 336.24045  |
| 12                      | 910.5  | 323.895    | 1.285       | 228.692  | 282.942  | 250.70066  |
| 13                      | 827.8  | 254.67     | 1.298       | 115.699  | 104.711  | 108.0009   |
| 14                      | 650.2  | 153.465    | 1.407       | 1001.505 | 1068.076 | 1014.09469 |
| 15                      | 691.9  | 170.235    | 1.417       | 130.667  | 145.63   | 135.38553  |
| Butyl acetate dimer     | 801.8  | 236.92499  | 1.615       | 606.229  | 706.899  | 643.43272  |
| 17                      | 951.5  | 371.47498  | 1.331       | 52.503   | 54.793   | 52.57504   |
| 1-hexanol dimer         | 869.1  | 285.675    | 1.654       | 48.915   | 66.288   | 56.44947   |
| 19                      | 874.7  | 290.16     | 1.703       | 194.199  | 280.95   | 232.82301  |
| Ethyl valerate dimer    | 893.5  | 305.955    | 1.681       | 1217.477 | 1593.819 | 1377.53504 |
| 21                      | 908.4  | 321.555    | 1.713       | 183.392  | 291.386  | 232.64122  |
| 22                      | 1004.3 | 444.99     | 1.686       | 43.548   | 35.184   | 38.57868   |
| 1-octen-3-one           | 979.3  | 407.745    | 1.275       | 65.955   | 67.71    | 65.49585   |
| 24                      | 968.5  | 393.31497  | 1.211       | 28.786   | 25.303   | 26.50361   |
| 25                      | 941.6  | 359.38498  | 1.207       | 31.622   | 29.696   | 30.04582   |
| 26                      | 1045.1 | 520.45496  | 1.205       | 229.409  | 210.148  | 215.38293  |
| 27                      | 1063.6 | 558.675    | 1.187       | 261.852  | 273.347  | 262.24751  |
| Methyl benzoate monomer | 1095.1 | 630.435    | 1.226       | 1254.907 | 1165.919 | 1186.20474 |
| Methyl benzoate dimer   | 1090.2 | 618.735    | 1.6         | 513.474  | 426.926  | 460.796    |



| Compound                 | RI     | Rt [sec]  | Dt [RIPrel] | H9-1     | H9-2     | H9-3       |
|--------------------------|--------|-----------|-------------|----------|----------|------------|
| Ethyl hexanoate monomer  | 1002.3 | 441.675   | 1.342       | 181.546  | 183.627  | 178.93477  |
| 31                       | 982.4  | 412.03497 | 1.386       | 116.378  | 117.485  | 114.59287  |
| 32                       | 1027.5 | 486.525   | 1.261       | 49.88    | 58.948   | 53.32572   |
| 33                       | 915.4  | 329.15997 | 1.327       | 120.885  | 130.598  | 123.22667  |
| 34                       | 759.5  | 209.23499 | 1.298       | 127.105  | 132.964  | 127.43381  |
| Ethyl hexanoate dimer    | 999.9  | 437.58    | 1.818       | 71.088   | 85.663   | 76.80799   |
| 36                       | 690.8  | 169.65    | 1.18        | 416.522  | 436.734  | 418.09544  |
| 37                       | 807.4  | 240.62999 | 1.82        | 38.34    | 43.533   | 40.11777   |
| 38                       | 1109.8 | 666.89996 | 1.26        | 106.668  | 89.352   | 96.0498    |
| 39                       | 1299   | 1377.87   | 1.213       | 570.614  | 518.13   | 533.48456  |
| 40                       | 861.4  | 279.63    | 0.951       | 444.327  | 415.951  | 421.53622  |
| 41                       | 1047.2 | 524.55    | 1.266       | 609.62   | 622.721  | 603.84709  |
| phenylacetaldehyde dimer | 1040.5 | 511.28998 | 1.541       | 52.988   | 53.702   | 52.2781    |
| n-Nonanal monomer        | 1104.2 | 652.86    | 1.499       | 1011.491 | 1023.744 | 997.26515  |
| n-Nonanal dimer          | 1103   | 649.74    | 1.937       | 385.852  | 374.521  | 372.58277  |
| 45                       | 1004.5 | 445.37997 | 1.426       | 131.825  | 128.019  | 127.32356  |
| 46                       | 827    | 254.08499 | 1.389       | 37.674   | 35.964   | 36.08262   |
| 47                       | 902.9  | 315.705   | 1.349       | 68.61    | 61.917   | 63.95823   |
| 48                       | 820.6  | 249.59999 | 1.414       | 94.145   | 94.069   | 92.22486   |
| 49                       | 901.2  | 313.94998 | 1.446       | 97.764   | 91.224   | 92.60412   |
| 50                       | 888    | 301.08    | 1.361       | 46.895   | 45.674   | 45.35881   |
| ethanol                  | 484.9  | 102.57    | 1.047       | 1487.96  | 1502.897 | 1465.51993 |
| Furfurol monomer         | 829.7  | 256.035   | 1.08        | 715.273  | 723.086  | 704.79591  |
| 53                       | 908    | 321.16498 | 1.575       | 47.234   | 60.779   | 52.92637   |
| 54                       | 893.9  | 306.345   | 1.564       | 123.476  | 139.825  | 129.01749  |
| 55                       | 814.3  | 245.31    | 1.475       | 114.468  | 118.68   | 114.24252  |
| 56                       | 782.5  | 224.44499 | 1.446       | 265.89   | 272.976  | 264.04434  |
| 57                       | 781.4  | 223.665   | 1.415       | 265.239  | 276.903  | 265.64958  |
| 58                       | 732.4  | 192.65999 | 1.312       | 49.023   | 47.574   | 47.33253   |
| 59                       | 756.4  | 207.28499 | 1.449       | 68.766   | 72.41    | 69.17624   |

| Compound                   | RI     | Rt [sec]  | Dt [RIPrel] | H9-1     | H9-2     | H9-3       |
|----------------------------|--------|-----------|-------------|----------|----------|------------|
| 60                         | 783.9  | 225.42    | 1.522       | 204.264  | 199.884  | 198.03252  |
| 1-pentanol dimer           | 759.5  | 209.23499 | 1.52        | 62.139   | 65.137   | 62.36524   |
| Acetic acid                | 574.9  | 127.725   | 1.061       | 1200.199 | 1152.959 | 1153.04742 |
| 63                         | 812.6  | 244.13998 | 1.282       | 74.228   | 66.358   | 68.88714   |
| 64                         | 788.5  | 228.34499 | 1.557       | 1889.208 | 1927.168 | 1870.02424 |
| Z-3-hexen-1-ol dimer       | 845    | 267.15    | 1.507       | 53.661   | 54.803   | 53.14736   |
| 66                         | 989.4  | 421.78497 | 1.247       | 523.681  | 548.67   | 525.45199  |
| Ethyl lactate dimer        | 811.7  | 243.555   | 1.539       | 70.739   | 88.296   | 77.92715   |
| Benzaldehyde dimer         | 961.2  | 383.75998 | 1.464       | 1311.933 | 1308.031 | 1283.78236 |
| Furfurol dimer             | 829.7  | 256.035   | 1.329       | 1919.307 | 1992.996 | 1917.02847 |
| 70                         | 1002.2 | 441.47998 | 1.467       | 179.865  | 231.895  | 201.7624   |
| Phenylacetaldehyde monomer | 1045.9 | 522.01495 | 1.24        | 822.826  | 833.817  | 811.75507  |
| 72                         | 1092.3 | 623.61    | 1.363       | 1226.486 | 1133.638 | 1156.46076 |
| 73                         | 1103.1 | 649.935   | 1.529       | 795.934  | 773.92   | 769.22846  |
| 74                         | 712.6  | 181.34999 | 1.081       | 66.025   | 62.663   | 63.05712   |
| 75                         | 827.5  | 254.47499 | 1.272       | 55.174   | 50.597   | 51.82779   |
| Ethyl lactate monomer      | 814.3  | 245.31    | 1.141       | 86.386   | 87.776   | 85.33938   |
| 77                         | 845    | 267.15    | 1.184       | 994.53   | 1034.012 | 993.98558  |
| Butyl acetate monomer      | 805.9  | 239.655   | 1.239       | 658.399  | 686.96   | 659.22591  |
| Ethyl valerate monomer     | 896.5  | 309.07498 | 1.26        | 453.669  | 475.778  | 455.42903  |
| Benzaldehyde monomer       | 960.1  | 382.395   | 1.148       | 799.43   | 803.03   | 785.2054   |
| 81                         | 982.1  | 411.645   | 1.45        | 223.518  | 212.511  | 213.65421  |
| 82                         | 982.4  | 412.03497 | 1.476       | 63.63    | 66.46    | 63.7441    |
| 83                         | 733.1  | 193.04999 | 1.335       | 34.74    | 33.477   | 33.42633   |
| 84                         | 753.6  | 205.53    | 1.345       | 82.085   | 73.01    | 75.99655   |
| 85                         | 876.9  | 291.91498 | 1.395       | 239.962  | 264.231  | 247.05457  |
| 86                         | 958.6  | 380.44498 | 1.383       | 398.21   | 407.015  | 394.56025  |
| 87                         | 961.7  | 384.34497 | 1.289       | 768.106  | 795.772  | 766.30022  |
| 88                         | 1144.4 | 761.67    | 1.406       | 210.116  | 210.919  | 206.30715  |
| 89                         | 1144.5 | 762.06    | 1.539       | 221.967  | 215.518  | 214.36765  |

| Compound                | RI     | Rt [sec]  | Dt [RIPrel] | H9-1     | H9-2     | H9-3       |
|-------------------------|--------|-----------|-------------|----------|----------|------------|
| 90                      | 1104.1 | 652.47    | 1.586       | 210.846  | 216.838  | 209.56516  |
| E -2-octenal            | 1062.2 | 555.75    | 1.326       | 349.044  | 364.793  | 349.78013  |
| 92                      | 1059.8 | 550.68    | 1.46        | 285.318  | 287.999  | 280.92533  |
| 93                      | 1031.8 | 494.52    | 1.369       | 157.35   | 172.681  | 161.71519  |
| E 2-heptenal            | 959.5  | 381.615   | 1.665       | 246.801  | 265.49   | 251.02259  |
| 95                      | 961    | 383.56497 | 1.563       | 756.509  | 779.586  | 752.68655  |
| 96                      | 739.7  | 196.95    | 0.956       | 138.287  | 146.14   | 139.36923  |
| 97                      | 800    | 235.75499 | 1.586       | 149.712  | 165.099  | 154.25739  |
| 98                      | 569.2  | 125.96999 | 1.174       | 291.865  | 297.873  | 288.97162  |
| 99                      | 571.7  | 126.74999 | 1.214       | 147.228  | 172.684  | 156.75688  |
| 100                     | 554.3  | 121.48499 | 1.196       | 118.592  | 126.636  | 120.16172  |
| 101                     | 717.2  | 183.885   | 1.394       | 32.925   | 41.02    | 36.23305   |
| 6-methyl-5-hepten-2-one | 992    | 425.49    | 1.17        | 115.902  | 100.311  | 105.94437  |
| 103                     | 984.7  | 415.155   | 1.15        | 224.08   | 214.786  | 215.04434  |
| 104                     | 787.3  | 227.56499 | 1.376       | 613.046  | 607.559  | 598.09645  |
| 105                     | 729.8  | 191.09999 | 1.51        | 109.811  | 96.613   | 101.14776  |
| 106                     | 913    | 326.625   | 1.412       | 284.421  | 340.34   | 306.13289  |
| 107                     | 898.4  | 311.025   | 1.387       | 503.45   | 499.444  | 491.41806  |
| 108                     | 891.3  | 303.81    | 1.645       | 185.277  | 208.451  | 192.92672  |
| Z-3-hexen-1-ol monomer  | 845.8  | 267.735   | 1.227       | 181.166  | 193.616  | 183.64318  |
| 110                     | 868.1  | 284.895   | 1.228       | 156.554  | 146.927  | 148.70569  |
| 111                     | 845.5  | 267.53998 | 1.418       | 177.305  | 177.356  | 173.78389  |
| 112                     | 965.9  | 389.805   | 1.237       | 174.155  | 183.237  | 175.12208  |
| 113                     | 415.4  | 86.579994 | 1.085       | 132.977  | 169.309  | 148.12014  |
| 114                     | 636.4  | 148.39499 | 1.365       | 237.18   | 248.114  | 237.79406  |
| Ethyl Acetate           | 597.4  | 134.94    | 1.331       | 3001.032 | 3160.273 | 3019.03945 |
| 116                     | 582.9  | 130.26    | 1.286       | 925.18   | 1002.2   | 944.4162   |
| 117                     | 569.8  | 126.16499 | 1.243       | 467.562  | 499.168  | 473.6977   |
